1 **Loci, genes, and gene networks associated with life history variation in a model**  
2 **ecological organism, *Daphnia pulex* (complex)**

3

4 Jacob W. Malcom<sup>1,2</sup>, Thomas E. Juenger<sup>1,3</sup>, and Mathew A. Leibold<sup>4</sup>

5

6 <sup>1</sup> Department of Integrative Biology, The University of Texas at Austin, 1 University Station  
7 #C0930, Austin, TX 78712, USA

8

9 <sup>2</sup> Defenders of Wildlife, 1130 17th Street NW, Washington, DC 20036

10

11 <sup>3</sup> Corresponding author: Department of Biology, University of Florida, Gainesville, Florida,  
12 32611-8525, USA

13

14

15 **ABSTRACT**

16 **Background**—Identifying the molecular basis of heritable variation provides insight into the  
17 underlying mechanisms generating phenotypic variation and the evolutionary history of  
18 organismal traits. Life history trait variation is of central importance to ecological and  
19 evolutionary dynamics, and contemporary genomic tools permit studies of the basis of this  
20 variation in non-genetic model organisms. We used high density genotyping, RNA-Seq gene  
21 expression assays, and detailed phenotyping of fourteen ecologically important life history traits  
22 in a wild-caught panel of 32 *Daphnia pulex* clones to explore the molecular basis of trait  
23 variation in a model ecological species.

24 **Results**—We found extensive phenotypic and a range of heritable genetic variation ( $\sim 0 < H^2 <$   
25  $0.44$ ) in the panel, and accordingly identify 75-261 genes—organized in 3-6 coexpression  
26 modules—associated with genetic variation in each trait. The trait-related coexpression modules  
27 possess well-supported promoter motifs, and in conjunction with marker variation at trans- loci,  
28 suggest a relatively small number of important expression regulators. We further identify a  
29 candidate genetic network with SNPs in eight known transcriptional regulators, and dozens of  
30 differentially expressed genes, associated with life history variation. The gene-trait associations  
31 include numerous un-annotated genes, but also support several a priori hypotheses, including an  
32 ecdysone-induced protein and several Gene Ontology pathways.

33 **Conclusion**—The genetic and gene expression architecture of *Daphnia* life history traits is  
34 complex, and our results provide numerous candidate loci, genes, and coexpression modules to  
35 be tested as the molecular mechanisms that underlie *Daphnia* eco-evolutionary dynamics.

36

37

## 38 INTRODUCTION

39 Determining the relationship between genetic, trait, and ecological variation is a key goal of  
40 contemporary biological research. Investigating the relationship between genotype and  
41 phenotype—including genotype x environment interactions—is the domain of genetics, which  
42 rarely extends to higher levels of organization such as populations and communities. A  
43 complement at higher levels of biological organization is the field of trait-based ecology, which  
44 focuses on the relationship between phenotype and ecological processes such as population  
45 dynamics and community assembly [1–4]. A key step forward is to solidify these cross-  
46 hierarchy links in ecologically well-studied settings, but this has not yet been accomplished. The  
47 main reasons for this shortcoming are two-fold: we know very little about the ecology, and the  
48 ecological context of evolution, of most model genetic organisms; and genetic resources are  
49 sparse for model ecological organisms [5–8]. Therefore, an ideal system with which to approach  
50 such a problem is one for which we possess both extensive genetic resources and ecological  
51 knowledge.

52         With the recent genome sequencing of the waterflea, *Daphnia pulex* (hereafter *Daphnia*),  
53 we can integrate information across levels of organization, from genetic sequence to ecologically  
54 important traits for an organism that is generally considered a keystone species [9, 10]. The  
55 *Daphnia* genome is approximately 227MB in length and is characterized by numerous tandem  
56 duplications with rapid divergence of expression patterns [11]. A century of ecological research  
57 has shown that *Daphnia* are central players in aquatic communities by acting as a key link  
58 between producers and carnivores; by controlling plant biomass and production; and by their  
59 effects on nutrient cycling in lakes (see [12] for a brief review). Arguably, we know the factors  
60 describing the requirement and impact niches [13] of *Daphnia* as well as, if not better than, any

61 other species. Furthermore, we know that rapid adaptation in *Daphnia* can have dramatic effects  
62 on ecological dynamics [14–17]. The nexus of ecological and evolutionary knowledge with  
63 genomic tools for a single species enables linking the levels of biological organization in a way  
64 not possible for classical model genetic species and other model ecological species.

65         Several life history traits are central to shaping ecological and evolutionary dynamics,  
66 both in *Daphnia* and more generally. To provide context, we briefly review the general  
67 relevance of size, growth, and fecundity to ecological variation, including the specific  
68 connections to *Daphnia* biology. Next, we set out several a priori hypotheses concerning the  
69 genes and biological pathways we might expect, based on the literature, to be associated with  
70 variation in the life history traits examined. Finally, we define the goals of the present study—  
71 which are largely descriptive—before moving on to the results.

## 72 **The ecological importance of life history traits**

73 Life history traits are among the ecologically most-important for a wide array of taxa. Few traits  
74 are thought to affect ecological dynamics more than body size [18, 19]: metabolism scales with  
75 body size and is predictive of macroecological patterns [20, 21]; body size limits the upper size  
76 of food an individual can consume (e.g., [22]), and body size is intimately tied to predation  
77 susceptibility [23]. Size is also strongly correlated with the number and size of offspring  
78 produced [24], which is a vital aspect of fitness and population growth. Individuals who tend to  
79 grow faster are larger as adults and tend to require more resources than individuals who are  
80 smaller. As a result, the nutritional requirements are greater, and the impacts on resource  
81 availability are greater, for larger individuals [25].

82         These (and many other) trait:ecology mappings have been examined in *Daphnia*.  
83 Patterns of cladoceran body size, and *Daphnia* in particular, formed the empirical basis for

84 Brooks and Dodson's influential size efficiency hypothesis [26]. They argued that larger species  
85 such as *Daphnia* are better competitors and should dominate any given community except in the  
86 face of vertebrate predators. While true in some cases, there are many caveats to the general  
87 pattern [27], including the fact that competitive outcomes with respect to body size are  
88 conditional on food quantity and quality: larger *Daphnia* have an advantage when algae is  
89 abundant and high-quality, but smaller organisms or individuals gain the upper hand when algae  
90 density or quality is low [28, 29].

91 While size confers certain competitive advantages and disadvantages, it also shapes  
92 predation risk. Large *Daphnia* are more visible and therefore more susceptible to predation by  
93 vertebrate predators [30–32]. Rapid evolution—within a single season, and spanning just a few  
94 generations—of body size in response to seasonal changes in fish predation regimes has been  
95 demonstrated in the species [33, 34]. In contrast to the interaction of size and vertebrate  
96 predators, small *Daphnia* are susceptible to predation by invertebrates, including the well-studied  
97 effects of the midge larvae (*Chaoborus* spp.) and copepods, which are unable to effectively  
98 handle larger prey [35–38]. Furthermore, vertebrate and invertebrate predator regimes are not  
99 independent of one-another [37, 39], nor are they independent of other ecological processes such  
100 as competitive interactions [40]. Body size and its associated traits are thus key traits that  
101 mediate the relative susceptibility of *Daphnia* to different predators, and to be efficient resource  
102 exploiters in different habitats.

103 As competition and predation impose selection on *Daphnia* body size, correlated traits  
104 are also affected. For example, because reproductive output is often strongly correlated with  
105 maternal size, we expect that selection regimes favoring smaller *Daphnia* will also result in  
106 fewer and/or smaller offspring and affects influences ecological dynamics [33]. The size-

107 efficiency hypothesis suggests that larger offspring have greater competitive ability when food is  
108 scarce, but more, smaller offspring provide a numerical advantage when food is abundant;  
109 Tessier and Goulden [29] refined the hypothesis to state that larger individuals are at an  
110 advantage when food availability fluctuates extensively. Larger offspring tend to have higher  
111 growth rates, however, which requires higher nutrient concentrations to support growth (in  
112 particular, phosphate; [41, 42]). The nutrient environment in which *Daphnia* grow and  
113 reproduce is shaped by abiotic and biotic factors, e.g., shading alters algal stoichiometry to  
114 increase the amount of phosphorus relative to carbon, which interacts with genotype to alter  
115 growth rate and body size [43–47].

## 116 **Expectations**

117 While the genomic resources for *Daphnia* are a recent development, we can make several  
118 predictions about the genes and pathways expected to be associated with life history trait  
119 variation. Genome-wide expression and genotyping studies facilitate discovery of novel gene-  
120 trait associations [48], but post-hoc explanations of patterns are weaker than tests of a priori  
121 hypotheses. Decades of classic molecular, reverse-, and forward-genetic studies provide  
122 guidance as to the pathways and genes expected to be related to trait variation; before we  
123 analyzed any SNP-trait or expression-trait data for *Daphnia*, we therefore searched the existing  
124 literature for candidate genes and pathways that might allow us to make a priori hypotheses.  
125 Recovering expression or genotype variation in these pathways, related to trait variation,  
126 provides additional support for the statistical inference.

127       Insulin and insulin-like signaling pathways are commonly related to size- and growth-  
128 related traits in numerous model species [49–52]. Ecdysone-activated proteins, which regulate  
129 arthropod molting and were the top candidates in experimental evolution of fly body size [53],

130 are found in *Daphnia* (e.g., nucleolar protein c7b, which is a homolog of the *Drosophila* gene  
131 *mustard*). FOXO, a forkhead transcription factor, is central to insulin signaling and stress  
132 response, the latter of which was found to be a top body size-related pathway using flies from the  
133 *Drosophila* Genetic Reference Panel (DGRP; [54, 55]). Neuronal control of size—through  
134 related behaviors such as movement patterns and feeding rate—has been demonstrated, for  
135 example with *C. elegans* (*egl-4*, a cGMP-dependent kinase; [51]) and *Drosophila* (short  
136 neuropeptide F, a protein precursor thought to be central to chemosensation; [56]). Although  
137 some of these examples are very specific, they provide guidance on what to expect when  
138 exploring the genomics of life history variation in a newly developing model species such as  
139 *Daphnia*.

140       Less information is available about the genes and pathways underlying variation in the  
141 number of offspring or time between broods (clutches). The Gene Ontology categories for genes  
142 best-correlated to absolute fitness in flies from the *Drosophila* Genetic Reference Panel include  
143 proteolysis, signal transduction, and defense/immune response [57]. There are numerous  
144 vitellogenin-like genes in the *Daphnia* genome, and contaminant stressors have been shown to  
145 affect the expression of vitellogenin genes and the levels of the vitellogenin antagonist, juvenile  
146 hormone in *Daphnia magna* [58]. The copy number of yolk protein genes (*yp-1*, *yp-2*, and *yp-3*)  
147 is positively correlated with egg production in *Drosophila* [59], but there are no clear *Daphnia*  
148 homologs (the closest BLAST hits are to a pancreatic triacylglycerol lipase). Of note, the *yp*  
149 genes share sequence similarity with vertebrate lipases, which is thought to underlie the ability to  
150 store various steroids used in developmental signaling [60]. We expect to find support for some  
151 or all of these genes, plus new candidates, by association with variation in *Daphnia* fecundity  
152 traits.

153 Long gene lists are often of less utility than general terms associated with the function of  
154 groups of genes for understanding the biology of variation in quantitative traits. After  
155 considering a combination of the literature and basic biology, we developed a matrix of  
156 biological terms, guided by the Gene Ontology [61] and KEGG [62] frameworks, expected to be  
157 enriched for groups of the growth and fecundity traits (Table 1). These relationships are straight-  
158 forward, e.g., we anticipate enrichment for metabolism and genetic information processing  
159 groups of terms because of the need to convert materials into biomass, and several signaling and  
160 cell cycle-related terms because of their role in development and growth.

### 161 **Present goal**

162 Given the general ecological importance of size, growth, and fecundity; the well-established role  
163 variation in these traits plays in shaping *Daphnia* ecological and evolutionary dynamics; and a  
164 desire to understand the connections across the genetic, trait, and ecological levels of  
165 organization, we investigated the molecular basis of life history variation in a panel of wild-  
166 collected *Daphnia*. We quantified variation in fourteen growth and fecundity traits, used RNA-  
167 Seq to quantify constitutive gene expression variation across the panel, and genotyped each clone  
168 at an average of ~3 million loci. We then integrated this data to provide estimates of the  
169 relationships between genetic, expression, and phenotypic variation. The results indicate many  
170 genes organized in a relatively small number of coexpressed gene modules are associated with  
171 variation in these traits, provide novel hypotheses to be explored as the field of ecological  
172 genomics expands, and establish several candidates for genes underlying the interface of eco-  
173 evolutionary dynamics.

174



## 175 **RESULTS**

### 176 **Phenotypic variation**

177 There was substantial variation across the panel of 32 clones for all 14 traits that we measured.

178 First, the difference between the smallest and largest clones was approximately four-fold for

179 juvenile mass and three-fold for adult mass (Figures 1A-C). The differences were smaller for

180 *Daphnia* length and depth (Figures 1D-E), but of similar magnitude for growth rate (Figure 1F).

181 The variation in body sizes translated to substantial variation in the number of offspring, with up

182 to a 9-fold difference in brood size (Figures 2A-C). In addition, there was up to a three-fold

183 difference in interbrood period (Figures 2D-F). Clone-wise summary statistics are provided in

184 Supplemental Information (SI) Table 1.

185 Broad-sense heritability varied from ~0 to 0.44 for the life history traits, but some

186 evolvabilities (i.e., mean-scaled genetic variance) were particularly high although heritability

187 was relatively low (e.g., number and mass of first-brood offspring; Table 2). Phenotypic

188 correlations (Figure 3, above-diagonal) were generally weaker than genetic correlations (Figure

189 3, below diagonal), and each tended to be in the directions expected given prior results with

190 *Daphnia* and life history research in general. Adult mass was positively correlated with external

191 measurements, the number of offspring per brood, time to first reproduction and the interbrood

192 period. Adult mass was negatively correlated with the mass of offspring in the first brood; larger

193 females invested in more offspring rather than allocating resources to larger offspring. Although

194 the relationship was weaker, the number of offspring in a brood was negatively correlated with

195 the size of those offspring. One prominent exception to the expected correlations was the

196 negative relationship between offspring size and growth rate: smaller neonates grew faster than

197 larger neonates. Interestingly, environmental variance appears to canalize some correlations,

198 such as the weakly negative genetic correlations between adult body size (depth and length,  $-0.13$   
199  $> r > -0.15$ ) and mass of third-brood offspring, to strongly negative ( $r \sim -0.29$ ).

## 200 **Genetic variation**

201 Sequencing from 2b-RAD and RNA-Seq libraries resulted in an average  $2.2 \times 10^6$  raw reads per  
202 clone, which, when aligned to the *Daphnia* reference, resulted in  $5.5 \times 10^6$  genotyped base  
203 positions across the population and an average of  $4.66 \times 10^6$  loci genotyped per clone (s.d. =  $1.2$   
204  $\times 10^6$ ). There were 6338 loci polymorphic in the panel and typed in  $>75\%$  of clones;  
205 heterozygosity rate was low, with a mean across clones of 0.14%. Mean indel and substitution  
206 rates estimated during read mapping were  $2.7 \times 10^{-4}$  and 0.022, respectively. We observed few  
207 patterns of genome-wide genetic variation; for example, mean nucleotide diversity in 50kb  
208 sliding windows was relatively constant (Figure 4). Population structure is relatively low in the  
209 panel, and linkage disequilibrium appeared to decline relatively quickly, to background levels by  
210 about 200bp (see SI Text 1).

## 211 **Gene expression variation**

212 As expected given the wide variation in size, growth, and fecundity traits, we uncovered  
213 substantial variation in constitutive gene expression across the 32 clones. Although  $> 30,000$   
214 *Daphnia* genome features (i.e., genes) possessed at least one mapped read, subsequent analyses  
215 are based on a subset of 15,600 genes with mean expression of 5 reads per million mapped.  
216 Approximately 45% ( $n = 6434$ ) of genes were differentially expressed (DEGs) at  $p < 0.05$  after  
217 Benjamini-Hochberg FDR control at a 1% rate, using a generalized linear model with  
218 quasipoisson errors (see METHODS). DEGs possess a significantly higher broad-sense  
219 heritability (mean  $H^2 = 0.657$ ) compared to all expressed genes (mean  $H^2 = 0.508$ ,  $p < 2.2e-16$ ;

220 SI Figure 1). The degree of expression differences varied from 1.6- to 7000-fold, due only to  
221 genetic differences between clones in a common garden environment.

222 Global gene expression was highly modular, with 24-27 distinct coexpression modules  
223 recovered across a wide range of parameter conditions. The genes within each module were  
224 associated with 1-17 novel promoter motifs (SI Table 2) based on word enrichment in the  
225 sequence 1000bp upstream and 200bp downstream of the transcription start site, as determined  
226 with XXmotif (see METHODS). Each module was enriched for 6-97 Gene Ontology (GO)  
227 terms, ranging from generic “biological process” to more detailed “hydrolase activity” (SI Table  
228 3).

### 229 **Linking genotypic, expression, and trait variation**

230 We identified 14 SNPs (nominal  $p < 1e^{-5}$ ) and an average of 156 DEGs ( $p < 0.05$  and FDR  
231 control at 1%) whose variation was tightly correlated with variation in each of the fourteen  
232 growth and fecundity traits (Table 3, SI Table 4). Two gustatory receptors  
233 (hxAUG25s1441g78t1, hxJGI\_V11\_235732) were differentially expressed and associated with  
234 second and third brood sizes, but no insulin receptor or peptide-encoding genes were associated  
235 with growth and fecundity traits. One SNP (scaffold 17:1051920) was located in an ecdysone-  
236 induced protein gene, and one differentially expressed ecdysone receptor (hxAUG26res30g96t1,  
237 20-hydroxy-ecdysone receptor 20e) was associated with variation in offspring mass and adult  
238 tailspine length. Several lipases are differentially expressed and strongly correlated with number  
239 of offspring, time between broods, and adult tailspine length. There are currently 26  
240 vitellogenin-associated genes annotated in the *Daphnia* genome; expression of only one  
241 vitellogenin precursor, hxJGI\_V11\_307854, was associated with variation in adult body length,  
242 but not brood size, offspring size, or time between broods.

243 Genes associated with each life history trait clustered into 3-6 modules of coexpressed  
244 DEGs per trait (Table 3, SI Figure 2), drawn from an average of 4.3 global expression modules  
245 (range 2-8; SI Figure 3). There were substantial differences in the architecture of trait-specific  
246 coexpression networks. For example, while there is a similar number of genes associated with  
247 adult mass (Figure 5A) and third brood offspring mass (Figure 5B), the adult mass network has  
248 more “hub” genes (i.e., with high betweenness-centrality, a metric of the node’s importance in  
249 connecting the network) than the offspring mass network. The adult mass gene with the highest  
250 betweenness centrality is *Partner of bursicon*, a precursor for a neurohormone involved in  
251 molting [63]; the two hub genes of the offspring mass network encode ERK-a and Rab-32  
252 proteins, members of the MAPK/ERK signaling pathway [64].

253 Although 60% of genes associated with *Daphnia* growth and fecundity variation possess  
254 no functional annotation, we identified between seven and 79 GO terms enriched for each  
255 growth and fecundity related trait (SI Table 5). Across all fourteen traits, GO terms associated  
256 with gene expression regulation, protein transport, metabolism, cell proliferation, and signaling  
257 were among the top enriched Biological Process (BP) groups (Figure 6A). Correspondingly,  
258 nucleic acid binding, transporter activity, macromolecule binding, and receptor activity were  
259 among the groups of Molecular Function terms enriched (SI Figure 4). Traits characteristic of  
260 adult *Daphnia* (i.e., size and growth rate characteristics) were enriched for BP terms related to  
261 protein transport, cell cycle and proliferation, and growth (Figure 6B), while offspring-related  
262 traits were enriched for gene expression regulation, developmental processes, signaling, and cell  
263 death-associated BP terms (Figure 6C).

264 One mechanism driving gene coexpression is shared expression regulators, and by  
265 extension, shared recognition sequences in promoter regions. We identified between one and 17

266 promoter motifs enriched in the promoters of genes associated with each trait (SI Table 6). The  
267 number of motifs recovered per trait was proportional to the number of genes in each  
268 coexpression module considered, and support for each motif ranged from E-value  $< 1e^{-3}$  to  $1.4e^{-}$   
269 <sup>26</sup>. Motifs containing TGC repeats, such as Motif 1 (MTGCTGCTGCTGCTGYY) of first-brood  
270 offspring mass “turquoise” module, were associated with half of all growth and fecundity traits,  
271 suggesting that it may be a target of a general transcriptional regulator associated with size and  
272 reproduction; there was no strong sequence similarity with known *Drosophila* motifs, however.  
273 Several motifs with long cytosine repeats, such as the motif with the lowest E-value  
274 (CYCCCCCCCCCYHYHB,  $1.43e^{-26}$ ), are highly similar to the *Drosophila* motif target of  
275 CG7368, an unnamed transcription factor associated with phagocytosis [65]. The *Daphnia* gene  
276 with the highest sequence similarity to CG7368, ZFP-ZMS1 (hxAUG26us24g213t1), was  
277 differentially expressed but not strongly associated with variation in any of the traits.

### 278 **An integrated network hypothesis**

279 To generate a draft systems network hypothesis that spanned SNPs, DEGs, and traits, we  
280 intersected the DEGs strongly associated with SNP variation and trait variation to identify a  
281 systems genetic—i.e., spanning from genetic to expression to organismal variation—hypothesis  
282 for several growth and fecundity traits (Figure 7). This hypothesis is restricted to SNPs  
283 occurring in genes with transcription regulation annotations; although any of the SNPs associated  
284 with gene expression or trait variation (SI Table 7) may be causal or linked to causal variants, the  
285 annotations associated with these SNPs suggests a plausible regulatory mechanism. One of the  
286 markers is within an ecdysone-induced protein (hxAUG26us17g279t1) that is not differentially  
287 expressed, but the allelic variants strongly predict ( $p < 1e^{-7}$ ) the expression levels of 27 DEGs.  
288 The MAPK ERK-a and PA2G4 markers are both associated with cell proliferation through

289 different pathways [64], and are linked to time to first brood through associations with four  
290 DEGs.

291

## 292 **DISCUSSION**

293 One goal of contemporary biology is to predict the drivers of variation between levels of  
294 organization, from genetic sequence to ecosystems. The importance of the core life history  
295 traits of size, growth, and fecundity in shaping ecological dynamics has long been hypothesized,  
296 is encompassed by ecological theory, and we have empirical support of their importance in a few  
297 systems, including the ecological model organism, *Daphnia pulex*. The recent sequencing of the  
298 *Daphnia* genome means that we can begin to relate genetic, trait, and ecological variation, as  
299 well as identify the genes underlying rapid evolution and its ecological consequences. In this  
300 paper we provide a first pass at the map from genetic to trait variation in traits known to affect  
301 *Daphnia* ecology, given a panel of wild-caught clones. We find substantial variation at three  
302 levels of biological organization—genotype, gene expression, and organismal phenotype—while  
303 linking the levels and generating novel hypotheses to test as the *Daphnia* system matures for  
304 ecological genomic research.

305 The amount of observed natural phenotypic variation was not surprising given the variety  
306 of habitats—abiotic, competitive, and predation regimes—from which the panel was collected.  
307 Previous studies of *Daphnia* that measured organismal traits also recovered substantial levels of  
308 variation (e.g., [35, 39, 65, 66]) among clones, but often were more focused on interspecific  
309 differences. Some trait correlations qualitatively matched those of previous studies; for example,  
310 Spitze and colleagues found a strong positive correlation between growth rate and reproductive  
311 output [35], as we found. However, while we found effectively no correlation between time to

312 first brood and brood size, Spitze and colleagues recovered a negative correlation (-0.08 to -0.69,  
313 depending on the brood). We did not observe sign change between genetic and phenotypic  
314 correlations for any trait pair, and the degree of change was within expectations given  
315 heritabilities [68].

316 Our genome-wide genotyping offers one of the first population genomic examinations of  
317 the *D. pulex* group. While the panel is relatively small, we sampled individuals of all three  
318 ecotypes (two lake, fourteen shaded-pond, 16 sunny-pond) and found extensive genome-wide  
319 genetic variation with relatively little population structure. Coupled with the continuously  
320 distributed variation among the fourteen traits, this result supports reinforces other recent  
321 findings [69–71] suggesting continued gene flow between the ecologically isolated *D. pulex* and  
322 *D. pulicaria*, through hybrid back-crosses. Future population genomic studies with larger  
323 samples, and from across a larger geographic area, will shed light on the enigma that is the *D.*  
324 *pulex* group.

325 Our analysis recovered a highly structured and modular transcriptome in *Daphnia*. This  
326 finding reflects our expectations given the mechanisms of expression control (i.e., relatively few  
327 transcriptional regulators with many targets) and the results of similar studies [57, 72].  
328 Enrichment for a relatively small number of Gene Ontology terms per module, and the presence  
329 of well-supported promoter motifs among coexpressed genes, further supports the cohesion of  
330 the modules. Putative functional annotations may be transferred to currently un-annotated DEGs  
331 (~ 66% of DEGs) given the patterns of coexpression and shared promoters with functionally  
332 annotated genes [73], advancing our knowledge of *Daphnia* molecular biology while generating  
333 hypotheses that can be tested by more focused approaches. Such extension is, however, beyond  
334 the scope of the present work.

335           In addition to support for several a priori expectations—from ecdysone-activated genes  
336 and gustatory receptor gene expression, to enrichment for a variety of biological terms—we also  
337 identified hundreds of candidate genes associated with variation in the fourteen *Daphnia* growth  
338 and fecundity traits. This magnitude of discovery is expected from genome-wide approaches and  
339 provides a foundation for novel hypothesis-driven molecular research with *Daphnia*. For  
340 example, the fact that >60% of DEGs associated with *Daphnia* growth and fecundity variation  
341 have no functional annotation provides fertile ground for new discoveries and insights into the  
342 functional diversification of genes. Other results are better-known: the central roles of *Partner*  
343 *of bursicon*, ERK-a, and Rab-32 to *Daphnia* size variation networks captures these genes' known  
344 roles in development and cell proliferation in *Drosophila*.

345           The coexpression network analyses add to our collective knowledge about the inherent  
346 modularity of biological systems. Modularity—sets of interactions that are stronger within than  
347 between groups—is a common feature of biological systems, from neural networks to genetic  
348 architecture [74, 75]. Modularity itself may be a target of selection by decreasing interference  
349 between the modules [76], and intermediate levels of pleiotropy across modules should facilitate  
350 evolvability [77, 78]. Among the coexpression networks associated with variation in *Daphnia*  
351 traits examined here we found substantial variation in the degree and details of modularity. For  
352 example, although offspring and adult mass are the same character from different life stages,  
353 differences in the number of modules (three vs. five) and number of high betweenness-centrality  
354 genes (two vs. five) associated with each trait suggests different evolutionary potentials. How  
355 these coexpression modules are remodeled [79] across the developmental timeline, and in a  
356 variety of habitats, is an open question; the results provide a reference against which future  
357 research can be compared.



358           Variation in the GO terms enriched for the sets of genes associated with individual and  
359 groups of *Daphnia* growth and fecundity traits highlights similarities and differences in the  
360 underlying biological processes. Cell cycle, proliferation, and death are common between the  
361 groups of traits, but enrichment for protein transport and localization is restricted to adult size  
362 traits, while developmental processes are (as expected) enriched in offspring. We are not aware  
363 of similar analyses and comparisons in other species, but this observation suggests that  
364 quantifying numerous similar traits—rather than just one or two representatives of a trait class—  
365 has the potential to inform our understanding of the molecular basis of many small phenotypic  
366 distinctions [80, 81]. Note, however, that inferences from biological term analysis need to be  
367 tempered with the fact that most *Daphnia* genes are lineage-specific [11] and currently possess  
368 no functional annotation.

369           The goal of systems genetic approaches is to identify and understand the functional  
370 relationships between genetic variants; the genes whose expression (and post-transcriptional  
371 modifications) are affected by the genetic variants and environmental causes; and ultimately  
372 phenotypic variation [82, 83]. The combination of extensive genotype, expression, and  
373 phenotype data allowed us to generate a systems genetic hypothesis linking variation across  
374 these three levels of organization for *Daphnia* growth and fecundity. The relatively small size of  
375 the panel and lack of controlled crosses precluded a full probabilistic analysis of the network,  
376 and the focus in particular on genetic variants in “known” transcriptional regulators is cautious:  
377 for example, by requiring transitivity from genotype to organismal trait (i.e., markers associated  
378 with DEGs and one or more traits, with the DEGs also correlated with variation in the same trait)  
379 we restrict the core hypothesis (Figure 7) to eight markers and three traits. Many other loci and  
380 genes likely underlie growth and fecundity variation in *Daphnia*, but the elements of this

381 network are supported in various analyses and provide hypotheses to be tested. For example, the  
382 systems hypothesis suggests a major role for an ecdysone-induced protein on scaffold 17; as a  
383 major regulator of arthropod molting [84], the role of ecdysone (or rather, the targets of  
384 ecdysone) is a strong candidate for general regulation of *Daphnia* growth and fecundity. Future  
385 work that perturbs the *Daphnia* system—through crosses, RNAi [85], plasmid integration [86],  
386 environmental manipulations [87, 88], and other methods (see, e.g., [89])—will help expand  
387 upon and test the present hypothesis.

388         While the present work is a distinct advance for *Daphnia* genomics, the limitations of the  
389 approach used here must be recognized. First, the expression and phenotypic data were collected  
390 in a single, benign common garden setting, and *Daphnia* is well-known for its extensive  
391 phenotypic plasticity (e.g., [89–92]). These results provide a baseline against which future work,  
392 under a variety of ecologically interesting and realistic conditions, can be compared. Second, we  
393 used whole *Daphnia* for RNA collection, but tissue-specific expression differences are a well-  
394 known phenomenon among many organisms and genes [93]. Future research that aims to isolate  
395 expression to particular *Daphnia* tissues will certainly refine our understanding of the  
396 relationship between genotype, expression, and morphological variation.

397         There are two main implications of the present research for our collective understanding  
398 of *Daphnia* ecology and evolution. First, this is one of the few examples, if not the only  
399 example, of ecological genomics [94, 95] applied to an organism whose community ecological  
400 context is very well-studied. Because the implications for size and fecundity variation in  
401 *Daphnia* are known to extend both up and down trophic levels, identifying loci and genes  
402 affecting these traits drives at causes of the extended phenotype [96]. That is, if the genotype at  
403 scaffold\_17:1051920 (a T/C or T polymorphism) affects *Daphnia* size (through numerous

404 intermediary genes), then it is therefore predictive of the effects on phytoplankton communities  
405 through grazing pressure, and susceptibility to predation by vertebrate and invertebrate predators.  
406 This example and the hundreds of others discovered in this work provide numerous hypotheses  
407 to be tested as explanations of organismal and community variation.

408         Second, it has become apparent over the past decade that rapid evolution—changes  
409 occurring on the scale of just a few generations—can have dramatic ecological implications [15,  
410 97–99]. *Daphnia* has been a model system for examining eco-evolutionary dynamics of disease  
411 [100], predation [101, 102], and eutrophication [14], and in each of these cases the basic life  
412 history traits studied here play a central role in shaping the ecological interactions. An  
413 outstanding issue is identifying the loci underlying evolutionary change of ecological  
414 importance. For example, phenotype data alone cannot answer whether the same loci are  
415 involved in parallel bouts of adaptation, or if there are multiple, unique avenues of adaptation  
416 (see, e.g., [103, 104]). Because the panel was collected from natural populations, the results  
417 provide candidates for the loci that may be responsible for rapid, ecologically important  
418 evolution in *Daphnia*.

419

## 420 **CONCLUSION**

421 Here we have identified genetic and gene expression variants associated with variation in life  
422 history traits of the model ecological organism, *Daphnia pulex*. In addition to recovering several  
423 expected gene/pathway relationships, the analyses uncovered numerous novel gene-trait  
424 relationships that form the basis for future hypothesis-driven research. These results are an  
425 important first step for understanding the molecular basis of variation in *Daphnia* growth and  
426 fecundity—traits for which the impacts of variation extend across communities—and are

427 candidates for the molecular basis of ecologically important adaptation. Furthermore, these  
428 results may be vital resources in comparative analysis of the molecular evolution of organismal  
429 variation across the tree of life.

430

## 431 **METHODS**

### 432 **Clone collections and maintenance**

433 Nominal *Daphnia pulex*, *D. pulicaria*, and hybrid clones were collected from a variety of  
434 waterbodies in the area surrounding Kellogg Biological Station, Michigan, USA, in June 2009.  
435 The panel includes clones from the mesocosm experiments of [105]. Individuals were isolated  
436 and cultures started in Austin, TX, from a single female; after initial mortality of isolates and  
437 clone losses during the assay period, we obtained 32 unique lineages. All working cultures were  
438 maintained in ADaM media [106] in an environmental chamber at 20°C with 16:8 L:D cycles.  
439 They were fed daily 1-2ml Shellfish Diet (Reed Mariculture, Campbell, California), at  $2 \times 10^6$   
440 cells per milliliter, regularly supplemented with live *Scenedesmus acutus*.

### 441 **Phenotypic assays**

442 *Daphnia* are model organisms for studying maternal effects [107, 108], but such effects are not  
443 the focus of this work. To minimize maternal and grand-maternal effects on size, growth, and  
444 fecundity estimates, each replicate was reared through two generations of single-individual  
445 breeding before assaying the focal generation. All individuals in the assays were raised in 100ml  
446 cups in ADaM media and fed 1ml shellfish diet each day, supplemented with  $4 \times 10^5$  cells of *S.*  
447 *acutus* every-other-day. Half of the media was replaced in each cup every 3d, and each cup was  
448 thoroughly cleaned and all media replaced each week. Each cup was checked daily for the

449 presence of offspring and for mortality. If offspring were present, then they were counted and 2-  
450 4 placed into a new cup with fresh media and food. These individuals were randomly culled to a  
451 single individual within 2d of their birth, but young individual mortality required that >1 be  
452 retained initially. If the focal individual had died at the check, then the replicate was started over  
453 at the grand-maternal generation with an individual taken from the working culture.

454       Once the focal generation had been reached, we recorded the dates and sizes of the first,  
455 second, and third broods. All offspring of the first and third broods were collected and stored in  
456 a 1.5ml tissue tube in 95% ethanol in a -10oC freezer. The mother was collected and stored in  
457 the same manner at the release of her third brood. At regular intervals, we removed samples  
458 from storage for further measurement. Adult body length to the base of the tail spine, body  
459 depth at the deepest point, and tail spine length were measured to the nearest 0.1mm under a 10-  
460 40x dissecting microscope. Adults and 1-15 juveniles were then placed in pre-tared aluminum  
461 mini weigh boats and dried for 48-72h at 60°C prior to weighing. *Daphnia* mass was measured  
462 to the nearest 0.1µg on a Sartorius ultramicrobalance placed in a closed room on a stabilizing  
463 marble bench. (Note that we rounded all measurements to the nearest 1µg for analysis.) Growth  
464 rate was calculated as the difference between log(mean neonate mass) and log(adult mass)  
465 divided by the number of days between the birth and the third brood. Adults were collected after  
466 weighing, and stored at -10°C for stoichiometric analysis. Percent phosphorus of each adult was  
467 established by measuring absorbance spectrophotometrically at 850nm.

468       Given the phenotypic data for three replicates of each clone, we calculated quantitative  
469 genetic parameters using a random effects model of form  $\text{trait} \sim 1 + (1 | \text{clone})$  with the lme4  
470 package [109] for R 2.15 [110]. Genetic correlations between traits was calculated from  
471 genotypic trait values and phenotypic correlations from all data.

472 **Genomic samples**

473 We measured constitutive gene expression for each clone as a starting point for interrogating the  
474 genotype-phenotype map in *Daphnia*. To do so, we raised three replicate sets of cultures of each  
475 clone for RNA sampling in the same environmental chamber, and using the same feeding  
476 regimen, as the working cultures. Each culture was maintained at a low density of 8-12  
477 individuals per 150ml ADaM, for three generations. Even at this low density and high food  
478 provision, some clones appeared to be producing ephippia (resting stage eggs) whereas other  
479 clones were not. Collections were marked if there was any sign of ephippia production, which  
480 would likely alter gene expression profiles. Three individuals were collected from each replicate  
481 and each was stored in individual collection tubes to facilitate single-individual analysis of  
482 expression. That is, we collected a total nine individuals per clone. The collections took place  
483 on two adjacent days from 10:00-13:00h local time to minimize any circadian effects. Samples  
484 were placed immediately into a liquid nitrogen-filled Dewar, then transferred to and stored in a -  
485 80oC freezer.

486 After grinding by mortar and pestle in a liquid nitrogen bath, RNA was extracted from  
487 single individuals using Qiagen RNeasy kits (Qiagen, CA) per the manufacturer's instructions.  
488 RNA preparation for SOLiD sequencing followed the basic method of Meyer and colleagues  
489 [111]. In brief, this is a 3' tag RNA-Seq method whereby fragmented RNA is reverse-  
490 transcribed to a cDNA library, amplified, and tagged with a SOLiD-ready barcode. Initial  
491 fragmentation was accomplished by a single 3-minute period at 95oC in a thermocycler;  
492 fragmentation was confirmed by gel analysis. After fragmentation, a cDNA library was created  
493 by reverse transcription using SuperScript II reverse transcriptase and a switching template  
494 primer. We amplified the cDNA library using Titanium Taq and a thermocycle regimen of 5-  
495 min at 95C then 19 cycles at 95C (40s), 63C (1min), and 72C (1min). The PCR products were

496 purified using a NucleoMag 96 cleanup kit, per manufacturer's instructions. We quantified  
497 DNA concentrations after cleanup using a NanoDrop spectrophotometer. Barcodes were ligated  
498 to each sample using the SOLiD multiplex P1 oligo, 1uM barcode oligo, Titanium Taq, and a  
499 amplification profile of four cycles at 95°C (40s), 63°C (1min), and 72°C (1min). After  
500 amplification, samples were run on a 1x TBE gel, and size-selected between 180-250bp using a  
501 low molecular weight ladder (NEB #N3233S). The cDNA in each gel slice was extracted by  
502 immersing the gel slice in nuclease-free water overnight at 4°C. The 96 prepped libraries were  
503 given to the University of Texas Genome Sequencing and Analysis Facility (UT GSAF) for  
504 sequencing on SOLiD 5500XL and v4 platforms, with a target of 2 million 50-bp reads per  
505 sample.

506         Single *Daphnia* individuals did not yield sufficient gDNA for RAD genotyping, so we  
507 pooled three individuals of each clone for extraction. Genomic DNA (gDNA) was extracted  
508 using Qiagen DNeasy extraction kits (Qiagen, CA) per manufacturer's instructions, with two  
509 exceptions: we did not vortex samples, in order to ensure that gDNA remained intact before *AlfI*  
510 digestion, and we completed the final rinse with 40µl nuclease-free water rather than 100µl to  
511 increase yield concentration. In brief, the 2b-RAD genotyping method (Wang et al. 2012) uses  
512 the *AlfI* restriction enzyme to digest the gDNA: SOLiD-system adaptors were ligated to the  
513 digested DNA and unique barcodes are then incorporated with the ligated products for each  
514 sample. The target constructs are 136bp in length and were extracted from electrophoretic gels.  
515 Samples of the 32 clones were prepared and sent to the UT GSAF for sequencing at a target of 1  
516 million 50bp reads per sample.

## 517 **Genotyping**

518 We used the GATK [112, 113] two-phase genotyping process to call genotypes from the filtered  
519 SAM files. First, we used the IndelRealigner to correct for insertion and deletion errors inferred  
520 during mapping, then performed an initial genotyping pass with UnifiedGenotyper (using –  
521 ploidy 2, -glm BOTH, and –out\_mode EMIT\_ALL\_CONFIDENT\_SITES). From the first-pass  
522 genotyping we extracted variant sites in the 90th percentile of both genotype qualities (GQ) and  
523 QUAL scores as high-quality genotypes to be used in base quality score recalibration. After  
524 applying BaseRecalibrator we performed a second round of genotyping and extracted variants  
525 with  $GQ > 30$  ( $p < 0.001$ ). Subsequent analyses based on genotypic variation used a subset of  
526 loci in which  $\geq 78\%$  of clones ( $\geq 25$ ) were genotyped.

527 Two risks of using RNA-Seq derived reads for genotyping include allele-specific  
528 expression [114] and RNA editing [115]. To test if these potential sources of error were  
529 introducing significant bias, we genotyped all clones with DNA- and RNA-only data sources and  
530 compared genotype calls at overlapping sites: if either error source is prevalent, we expect to  
531 detect many more heterozygous loci from DNA-derived sequence. There were an average of  
532 7122 overlapping loci per clone, and 10.3 differences on average, but both DNA- and RNA-  
533 derived genotypes possessed heterozygous calls when the alternate call was homozygous. Given  
534 the very low error rate (0.14%) and the fact that *Daphnia* genomics is a very young field, we  
535 opted to retain the joint genotype data with a very slightly higher false discovery risk.

## 536 **Expression analysis**

537 We used the classic SHRiMP output and the probcalc function for expression analysis,  
538 classifying mappings with normodds  $> 0.66$  (odds-ratio  $\geq 2$  for the next-best mapping) as  
539 uniquely mapped. Ambiguously mapped reads were allocated to multiple genes in proportion to



540 the support for the mapping and the proportion of uniquely mapped reads assigned to each gene.  
541 While allocation is required to reduce bias against multi-copy versus single-copy genes, it is  
542 known that allocating multimapped reads biases low-expressed genes high [116], however,  
543 because low-coverage genes (< 5 reads per million mapped) were excluded from analysis this  
544 source of bias is negligible in the expression data. Last, to achieve comparability between clones  
545 with different sequencing coverage, all expression levels were converted to reads per million  
546 mapped and rounded to the nearest integer.

547 We used a generalized linear model (GLM) with quasipoisson errors, log link function,  
548 and variance inflation estimated for each gene from the pooled data to test for differentially  
549 expressed genes (DEGs), with clone ID as the predictor [117]. P-values were derived by  
550 likelihood ratio test against the null model, significance was set at  $p < 0.05$ , and Benjamini-  
551 Hochberg false discovery rate (FDR) control was exerted at a 1% rate.

## 552 **Marker- and gene-trait associations**

553 We tested for marker-trait variation using a linear model and set significance at a nominal p-  
554 value of  $1e^{-5}$ . Only markers with at least three clones possessing the minor allele (i.e., 9-12%  
555 minor allele frequency, depending on the number of clones typed at a locus) were used in this  
556 analysis.

557 We used distance correlation, which is not dependent on linear or monotonic  
558 relationships between variables [118–120], to quantify the strength of association between  
559 organismal trait means and gene expression means. The p-values of distance correlations were  
560 derived from extensive bootstrapping of expression data, and FDR control exerted at the 1%  
561 level. Genes whose expression was significantly associated with variation in each trait were  
562 retained as initial candidates underlying variation.

## 563 **Coexpression networks and candidate gene refinement**

564 We used WGCNA [121] to (a) identify gene coexpression modules associated with each trait and  
565 (b) refine the list of candidate genes. We applied WGCNA to the residuals of trait:gene  
566 regressions to reduce the occurrence of false-positives; three regression models (linear, log-  
567 limited, and negative exponential) were tested for each trait-gene combination because non-  
568 linear relationships from distance correlation were detected, and the residuals from the model  
569 with the highest  $R^2$  were used. Genes that did not cluster into a module (i.e., assigned the “gray”  
570 module of WGCNA) were removed from the candidate list as likely false-positives [57].  
571 Modules were identified by estimating the exponent required for a scale-free distribution, and  
572 module membership refined by adjusting `reassignThreshold` and `mergeCutHeight` to best-match  
573 the modules apparent in the heat map. Additional flags included `pamStage=FALSE`,  
574 `TOMType=“unsigned”`, `TOMDenom=“mean”`, and `minModuleSize=8`. Network figures were  
575 created in Cytoscape by exporting the WGCNA data for the best-connected.

576       After identifying the final candidate gene list for each trait we used the `GOstats` package  
577 for R [122] to test for Gene Ontology (GO) term enrichment. We defined gene universes for (a)  
578 all *Daphnia* genes with GO annotations and (b) *Daphnia* DEGs with functional annotations.  
579 Because relatively few *Daphnia* genes possess functional annotation (~25%), we set  
580 `pvalueCutoff` at 0.1. Enrichment was quantified both at the level of all candidate genes for a trait  
581 and module-wise for the WGCNA-defined modules associated with variation in a trait. We used  
582 `REVIGO` [123] for GO term enrichment visualization.

583       We used `XXmotif` [124] to identify candidate promoter motifs shared among the genes  
584 and modules associated with variation in each trait. Promoters were extracted from the *Daphnia*  
585 genome file from 1000bp upstream and 200bp downstream of each gene’s transcription start site,  
586 both strands were searched for motifs, a background model of order 2 was employed, and a

587 medium threshold was used for merging similar motifs. We retained motifs with  $E < 0.1$ , which  
588 corresponds to  $E < 0.01$  because XXmotif estimates are biased high by approximately an order of  
589 magnitude for these sample sizes (see Supp. Info. 1 of [124]). We searched TOMTOM [125] for  
590 known motifs in *Drosophila* similar to those recovered with XXmotif.

591 To identify candidate regulators of trait-specific coexpression modules, we mined (case-  
592 insensitive grep) module members with annotations for “transcriptional regulation”, “kinase” and  
593 “MAPK”, because the known role of TFs, kinases, and particularly mitogen-activated phosphate  
594 kinases in transcription regulation. The integrated network of Figure 1.7 was created by  
595 intersecting the (transcription-associated) marker-DEG, DEG-DEG, and DEG-trait data to  
596 establish relationships across levels of biological organization.

597

## 598 **ACKNOWLEDGEMENTS**

599 This work was supported by grants from the University of Texas at Austin (UT) to JWM and  
600 MAL and NSF DEB 0717370 to MAL. Sequencing was completed by the UT Genome  
601 Sequencing and Analysis Facility, and the Texas Advanced Computing Center provided access  
602 to the Lonestar supercomputing resource for many of the analyses reported here. We thank Mike  
603 Pfrender and Misha Matz for providing helpful comments on earlier drafts.

604

605 **LITERATURE CITED**

- 606 1. McGill BJ, Enquist BJ, Weiher E, Westoby M. **Rebuilding community ecology from**  
607 **functional traits.** Trends Ecol Evol 2006; 21:178–185.
- 608 2. Ackerly DD, Cornwell WK. **A trait-based approach to community assembly: partitioning**  
609 **of species trait values into within- and among-community components.** Ecol Lett 2007;  
610 10:135–145.
- 611 3. Messier J, McGill BJ, Lechowicz MJ. **How do traits vary across ecological scales? A case**  
612 **for trait-based ecology.** Ecol Lett 2010; 9999.
- 613 4. Webb CT, Hoeting JA, Ames GM, Pyne MI, LeRoy Poff N. **A structured and dynamic**  
614 **framework to advance traits-based theory and prediction in ecology.** Ecol Lett 2010;  
615 13:267–283.
- 616 5. Feder ME, Mitchell-Olds T. **Evolutionary and ecological functional genomics.** Nat Rev  
617 Genet 2003; 4:649–655.
- 618 6. Tollrian R, Leese F. **Ecological genomics: steps towards unraveling the genetic basis of**  
619 **inducible defenses in *Daphnia*.** BMC Biol 2010; 8:51.
- 620 7. Wheat C. **Rapidly developing functional genomics in ecological model systems via 454**  
621 **transcriptome sequencing.** Genetica 2010; 138:433–451.
- 622 8. Miner BE, Meester LD, Pfrender ME, Lampert W, Hairston NG. **Linking genes to**  
623 **communities and ecosystems: *Daphnia* as an ecogenomic model.** Proc R Soc B Biol Sci 2012;  
624 279:1873–1882.
- 625 9. Carpenter SR, Kitchell JF. **The Trophic Cascade in Lakes.** Cambridge University Press;  
626 1996.
- 627 10. Leibold MA. **A graphical model of keystone predators in food webs: Trophic regulation**  
628 **of abundance, incidence, and diversity patterns in communities.** Am Nat 1996; 147:784–812.
- 629 11. Colbourne JK, Pfrender ME, Gilbert D, Thomas WK, Tucker A, Oakley TH, Tokishita S,  
630 Aerts A, Arnold GJ, Basu MK, Bauer DJ, Cáceres CE, Carmel L, Casola C, Choi J-H, Detter JC,  
631 Dong Q, Dusheyko S, Eads BD, Fröhlich T, Geiler-Samerotte KA, Gerlach D, Hatcher P, Jogdeo  
632 S, Krijgsveld J, Kriventseva EV, Kültz D, Laforsch C, Lindquist E, Lopez J, et al. **The**  
633 **Ecoresponsive Genome of *Daphnia pulex*.** Science 2011; 331:555–561.
- 634 12. Lampert W. ***Daphnia*: model herbivore, predator and prey.** Pol J Ecol 2006; 54:607–620.
- 635 13. Chase JM, Leibold MA. **Ecological Niches: Linking Classical and Contemporary**  
636 **Approaches.** University Of Chicago Press; 2003.
- 637 14. Hairston N, Lampert W, Caceres C, Holtmeier C, Weider L, Gaedke U, Fischer J, Fox J, Post  
638 D. **Lake ecosystems - Rapid evolution revealed by dormant eggs.** Nature 1999; 401:446–446.

- 639 15. Cousyn C, De Meester L, Colbourne JK, Brendonck L, Verschuren D, Volckaert F. **Rapid,**  
640 **local adaptation of zooplankton behavior to changes in predation pressure in the absence of**  
641 **neutral genetic changes.** Proc Natl Acad Sci 2001; 98:6256.
- 642 16. Duffy MA, Hall SR, Cáceres CE, Ives AR. **Rapid evolution, seasonality, and the**  
643 **termination of parasite epidemics.** Ecology 2009; 90:1441–1448.
- 644 17. Ellner SP, Geber MA, Hairston Jr NG. **Does rapid evolution matter? Measuring the rate**  
645 **of contemporary evolution and its impacts on ecological dynamics.** Ecol Lett 2011.
- 646 18. Peters RH. **The Ecological Implications of Body Size.** Volume 2. Cambridge University  
647 Press; 1986.
- 648 19. Loreau M. **From Populations to Ecosystems: Theoretical Foundations for a New**  
649 **Ecological Synthesis (MPB-46).** Princeton University Press; 2010.
- 650 20. Enquist BJ, West GB, Charnov EL, Brown JH. **Allometric scaling of production and life-**  
651 **history variation in vascular plants.** Nature 1999; 401:907–911.
- 652 21. West GB, Brown JH, Enquist BJ. **The fourth dimension of life: fractal geometry and**  
653 **allometric scaling of organisms.** Science 1999; 284:1677–1679.
- 654 22. Bogdan KG, Gilbert JJ. **Body size and food size in freshwater zooplankton.** Proc Natl  
655 Acad Sci 1984; 81:6427.
- 656 23. Abrams PA, Rowe L. **The effects of predation on the age and size of maturity of prey.**  
657 Evolution 1996:1052–1061.
- 658 24. Roff DA. **The Evolution of Life Histories: Theory and Analysis.** Springer; 1992.
- 659 25. Kreutzer C, Lampert W. **Exploitative competition in differently sized *Daphnia* species: a**  
660 **mechanistic explanation.** Ecology 1999; 80:2348–2357.
- 661 26. Brooks JL, Dodson SI. **Predation, Body Size, and Composition of Plankton.** Science 1965;  
662 150:28.
- 663 27. Hart RC, Bychek EA. **Body size in freshwater planktonic crustaceans: an overview of**  
664 **extrinsic determinants and modifying influences of biotic interactions.** Hydrobiologia 2010;  
665 668:61–108.
- 666 28. Goulden CE, Henry LL, Tessier AJ. **Body Size, Energy Reserves, and Competitive Ability**  
667 **in Three Species of Cladocera.** Ecology 1982; 63:1780–1789.
- 668 29. Tessier A, Goulden C. **Estimating food limitation in cladoceran populations.** Limnol  
669 Oceanogr 1982; 27:707–717.
- 670 30. Wright DI, O'Brien WJ. **Differential location of *Chaoborus* larvae and *Daphnia* by fish:**  
671 **the importance of motion and visible size.** Am Midl Nat 1982:68–73.

- 672 31. Wetterer JK. **Mechanisms of prey choice by planktivorous fish: perceptual constraints**  
673 **and rules of thumb.** Anim Behav 1989; 37:955–967.
- 674 32. Cerný M, Bytel J. **Density and size distribution of *Daphnia* populations at different fish**  
675 **predation levels.** Hydrobiologia 1991; 225:199–208.
- 676 33. Tessier A, Young A, Leibold M. **Population dynamics and body-size selection in**  
677 ***Daphnia*.** Limnol Oceanogr 1992; 37:1–13.
- 678 34. Wolinska J, Löffler A, Spaak P. **Taxon-specific reaction norms to predator cues in a**  
679 **hybrid *Daphnia* complex.** Freshw Biol 2007; 52:1198–1209.
- 680 35. Spitze K, Burnson J, Lynch M. **The covariance structure of life-history characters in**  
681 ***Daphnia pulex*.** Evolution 1991; 45:1081–1090.
- 682 36. Gliwicz Z, Umana G. **Cladoceran body-size and vulnerability to copepod predation.**  
683 Limnol Oceanogr 1994; 39:419–424.
- 684 37. Beckerman AP, Rodgers GM, Dennis SR. **The reaction norm of size and age at maturity**  
685 **under multiple predator risk.** J Anim Ecol 2010; 79:1069–1076.
- 686 38. Dennis SR, Carter MJ, Hentley WT, Beckerman AP. **Phenotypic convergence along a**  
687 **gradient of predation risk.** Proc R Soc B Biol Sci 2011; 278:1687–1696.
- 688 39. Leibold M, Tessier AJ. **Contrasting patterns of body size for *Daphnia* species that**  
689 **segregate by habitat.** Oecologia 1991; 86:342–348.
- 690 40. Gliwicz Z, Wrzosek D. **Predation-mediated coexistence of large- and small-bodied**  
691 ***Daphnia* at different food levels.** Am Nat 2008; 172:358–374.
- 692 41. Sterner RW, Elser JJ. **Ecological Stoichiometry: The Biology of Elements from Molecules**  
693 **to the Biosphere.** Princeton University Press; 2002.
- 694 42. Elser JJ, Acharya K, Kyle M, Cotner J, Makino W, Markow T, Watts T, Hobbie S, Fagan W,  
695 Schade J, Hood J, Sterner RW. **Growth rate–stoichiometry couplings in diverse biota.** Ecol  
696 Lett 2003; 6:936–943.
- 697 43. Main T, Dobberfuhl D, Elser J. **N:P stoichiometry and ontogeny of crustacean**  
698 **zooplankton: A test of the growth rate hypothesis.** Limnol Oceanogr 1997; 42:1474–1478.
- 699 44. Urabe J, Kyle M, Makino W, Yoshida T, Andersen T, Elser J. **Reduced light increases**  
700 **herbivore production due to stoichiometric effects of light/nutrient balance.** Ecology 2002;  
701 83:619–627.
- 702 45. Hall S, Leibold M, Lytle D, Smith V. **Stoichiometry and planktonic grazer composition**  
703 **over gradients of light, nutrients, and predation risk.** Ecology 2004; 85:2291–2301.

- 704 46. Weider LJ, Makino W, Acharya K, Glenn KL, Kyle M, Urabe J, Elser JJ. **Genotype X**  
705 **environment interactions, stoichiometric food quality effects, and clonal coexistence in**  
706 ***Daphnia pulex***. *Oecologia* 2005; 143:537–547.
- 707 47. Shimizu Y, Urabe J. **Regulation of phosphorus stoichiometry and growth rate of**  
708 **consumers: theoretical and experimental analyses with *Daphnia***. *Oecologia* 2007; 155:21–  
709 31.
- 710 48. Bruggeman FJ, Westerhoff HV. **The nature of systems biology**. *Trends Microbiol* 2007;  
711 15:45–50.
- 712 49. Stocker H, Hafen E. **Genetic control of cell size**. *Curr Opin Genet Dev* 2000; 10:529–535.
- 713 50. Brogiolo W, Stocker H, Ikeya T, Rintelen F, Fernandez R, Hafen E. **An evolutionarily**  
714 **conserved function of the *Drosophila* insulin receptor and insulin-like peptides in growth**  
715 **control**. *Curr Biol* 2001; 11:213–221.
- 716 51. Fujiwara M, Sengupta P, McIntire SL. **Regulation of Body Size and Behavioral State of *C.***  
717 ***elegans* by Sensory Perception and the EGL-4 cGMP-Dependent Protein Kinase**. *Neuron*  
718 2002; 36:1091–1102.
- 719 52. Boucher P, Ditlecadet D, Dubé C, Dufresne F. **Unusual duplication of the insulin-like**  
720 **receptor in the crustacean *Daphnia pulex***. *BMC Evol Biol* 2010; 10:305.
- 721 53. Turner TL, Stewart AD, Fields AT, Rice WR, Tarone AM. **Population-based resequencing**  
722 **of experimentally evolved populations reveals the genetic basis of body size variation in**  
723 ***Drosophila melanogaster***. *PLoS Genet* 2011; 7:e1001336.
- 724 54. Jumbo-Lucioni P, Ayroles J, Chambers M, Jordan K, Leips J, Mackay T, De Luca M.  
725 **Systems genetics analysis of body weight and energy metabolism traits in *Drosophila***  
726 ***melanogaster***. *BMC Genomics* 2010; 11:297.
- 727 55. Mackay TFC, Richards S, Stone EA, Barbadilla A, Ayroles JF, Zhu D, Casillas S, Han Y,  
728 Magwire MM, Cridland JM, Richardson MF, Anholt RRH, Barron M, Bess C, Blankenburg KP,  
729 Carbone MA, Castellano D, Chaboub L, Duncan L, Harris Z, Javaid M, Jayaseelan JC, Jhangiani  
730 SN, Jordan KW, Lara F, Lawrence F, Lee SL, Librado P, Linheiro RS, Lyman RF, et al. **The**  
731 ***Drosophila melanogaster* Genetic Reference Panel**. *Nature* 2012; 482:173–178.
- 732 56. Lee K-S, You K-H, Choo J-K, Han Y-M, Yu K. ***Drosophila* Short Neuropeptide F**  
733 **Regulates Food Intake and Body Size**. *J Biol Chem* 2004; 279:50781–50789.
- 734 57. Ayroles JF, Carbone MA, Stone EA, Jordan KW, Lyman RF, Magwire MM, Rollmann SM,  
735 Duncan LH, Lawrence F, Anholt RRH, Mackay TFC. **Systems genetics of complex traits in**  
736 ***Drosophila melanogaster***. *Nat Genet* 2009; 41:299–307.
- 737 58. Heckmann L-H, Sibly RM, Connon R, Hooper HL, Hutchinson TH, Maund SJ, Hill CJ,  
738 Bouetard A, Callaghan A. **Systems biology meets stress ecology: linking molecular and**  
739 **organismal stress responses in *Daphnia magna***. *Genome Biol* 2008; 9:R40.

- 740 59. Bownes M, Lineruth K, Mauchline D. **Egg production and fertility in *Drosophila* depend**  
741 **upon the number of yolk-protein gene copies.** Mol Gen Genet MGG 1991; 228:324–327.
- 742 60. Bownes M. **Why is there sequence similarity between insect yolk proteins and**  
743 **vertebrate lipases?** J Lipid Res 1992; 33:777–790.
- 744 61. Ashburner M, Ball CA, Blake JA, Botstein D, Butler H, Cherry JM, Davis AP, Dolinski K,  
745 Dwight SS, Eppig JT. **Gene Ontology: tool for the unification of biology.** Nat Genet 2000;  
746 25:25–29.
- 747 62. Kanehisa M, Goto S. **KEGG: kyoto encyclopedia of genes and genomes.** Nucleic Acids  
748 Res 2000; 28:27–30.
- 749 63. Mendive FM, Van Loy T, Claeysen S, Poels J, Williamson M, Hauser F, Grimmlikhuijzen  
750 CJ, Vassart G, Vanden Broeck J. ***Drosophila* molting neurohormone bursicon is a**  
751 **heterodimer and the natural agonist of the orphan receptor DLGR2.** FEBS Lett 2005;  
752 579:2171–2176.
- 753 64. Seger R, Krebs EG. **The MAPK signaling cascade.** FASEB J 1995; 9:726–735.
- 754 65. Tweedle S, Ashburner M, Falls K, Leyland P, McQuilton P, Marygold S, Millburn G,  
755 Osumi-Sutherland D, Schroeder A, Seal R, Zhang H. **FlyBase: Enhancing *Drosophila* Gene**  
756 **Ontology annotations.** Nucleic Acids Res 2009; 37:D555–D559.
- 757 66. Lynch M. **The limits to life history evolution in *Daphnia*.** Evolution 1984:465–482.
- 758 67. Pfrender ME, Lynch M. **Quantitative genetic variation in *Daphnia*: temporal changes in**  
759 **genetic architecture.** Evolution 2000; 54:1502–1509.
- 760 68. Lynch M, Walsh B. **Genetics and analysis of quantitative traits.** 1998.
- 761 69. Adamowicz SJ, Petrusek A, Colbourne JK, Hebert PDN, Witt JDS. **The scale of divergence:**  
762 **A phylogenetic appraisal of intercontinental allopatric speciation in a passively dispersed**  
763 **freshwater zooplankton genus.** Mol Phylogenet Evol 2009; 50:423–436.
- 764 70. Heier C, Dudycha JL. **Ecological speciation in a cyclic parthenogen: Sexual capability of**  
765 **experimental hybrids between *Daphnia pulex* and *Daphnia pulex*.** Limnol Oceanogr  
766 2009; 54:492–502.
- 767 71. Cristescu ME, Constantin A, Bock DG, Cáceres CE, Crease TJ. **Speciation with gene flow**  
768 **and the genetics of habitat transitions.** Mol Ecol 2012; 21:1411–1422.
- 769 72. Stuart JM, Segal E, Koller D, Kim SK. **A Gene-Coexpression Network for Global**  
770 **Discovery of Conserved Genetic Modules.** Science 2003; 302:249–255.
- 771 73. Škunca N, Altenhoff A, Dessimoz C. **Quality of Computationally Inferred Gene Ontology**  
772 **Annotations.** PLoS Comput Biol 2012; 8:e1002533.



- 773 74. Alon U. **Biological networks: the tinkerer as an engineer.** *Science* 2003; 301:1866–1867.
- 774 75. Barabasi A-L, Oltvai ZN. **Network biology: understanding the cell’s functional**  
775 **organization.** *Nat Rev Genet* 2004; 5:101–113.
- 776 76. Espinosa-Soto C, Wagner A. **Specialization Can Drive the Evolution of Modularity.** *PLoS*  
777 *Comput Biol* 2010; 6:e1000719.
- 778 77. Hansen TF. **Is modularity necessary for evolvability?: Remarks on the relationship**  
779 **between pleiotropy and evolvability.** *Biosystems* 2003; 69:83–94.
- 780 78. Hansen T. **The evolution of genetic architecture.** *Annu Rev Ecol Evol Syst* 2006; 37:123–  
781 157.
- 782 79. Ideker T, Krogan NJ. **Differential network biology.** *Mol Syst Biol* 2012; 8.
- 783 80. Houle D. **Evolution in Health and Medicine Sackler Colloquium: Numbering the hairs**  
784 **on our heads: The shared challenge and promise of phenomics.** *Proc Natl Acad Sci* 2009.
- 785 81. Houle D, Govindaraju DR, Omholt S. **Phenomics: the next challenge.** *Nat Rev Genet* 2010;  
786 11:855–866.
- 787 82. Loewe L. **A framework for evolutionary systems biology.** *BMC Syst Biol* 2009; 3:27.
- 788 83. Nadeau JH, Dudley AM. **Systems Genetics.** *Science* 2011; 331:1015–1016.
- 789 84. Ishimoto H, Kitamoto T. **The Steroid Molting Hormone Ecdysone Regulates Sleep in**  
790 **Adult *Drosophila melanogaster*.** *Genetics* 2010; 185:269–281.
- 791 85. Kato Y, Shiga Y, Kobayashi K, Tokishita S, Yamagata H, Iguchi T, Watanabe H.  
792 **Development of an RNA interference method in the cladoceran crustacean *Daphnia magna*.**  
793 *Dev Genes Evol* 2011.
- 794 86. Kato Y, Matsuura T, Watanabe H. **Genomic Integration and Germline Transmission of**  
795 **Plasmid Injected into Crustacean *Daphnia magna* Eggs.** *PLoS ONE* 2012; 7:e45318.
- 796 87. Jeyasingh PD, Ragavendran A, Paland S, Lopez JA, Sterner RW, Colbourne JK. **How do**  
797 **consumers deal with stoichiometric constraints? Lessons from functional genomics using**  
798 ***Daphnia pulex*.** *Mol Ecol* 2011; 20:2341–2352.
- 799 88. Pfrender ME. **Triangulating the genetic basis of adaptation to multifarious selection.** *Mol*  
800 *Ecol* 2012; 21:2051–2053.
- 801 89. Simon J-C, Pfrender ME, Tollrian R, Tagu D, Colbourne JK. **Genomics of Environmentally**  
802 **Induced Phenotypes in 2 Extremely Plastic Arthropods.** *J Hered* 2011; 102:512–525.
- 803 90. Spitze K. **Predator-mediated plasticity of prey life-history and morphology *Chaoborus***  
804 ***americanus* predation on *Daphnia pulex*.** *Am Nat* 1992; 139:229–247.

- 805 91. Tollrian R. **Neckteeth formation in *Daphnia pulex* as an example of continuous**  
806 **phenotypic plasticity: morphological effects of *Chaoborus* kairomone concentration and**  
807 **their quantification.** J Plankton Res 1993; 15:1309–1318.
- 808 92. Bernot R, Dodds W, Quist M, Guy C. **Temperature and kairomone induced life history**  
809 **plasticity in coexisting *Daphnia*.** Aquat Ecol 2006; 40:361–372.
- 810 93. Wray GA, Hahn MW, Abouheif E, Balhoff JP, Pizer M, Rockman MV, Romano LA. **The**  
811 **evolution of transcriptional regulation in eukaryotes.** Mol Biol Evol 2003; 20:1377–1419.
- 812 94. Antonovics J. **Toward community genomics?** Ecology 2003; 84:598–601.
- 813 95. Stearns SC, Magwene P. **The Naturalist in a World of Genomics.** Am Nat 2003; 161:171–  
814 180.
- 815 96. Dawkins R. **The Extended Phenotype: The Long Reach of the Gene.** Oxford University  
816 Press, USA; 1982.
- 817 97. Thompson JN. **Rapid evolution as an ecological process.** Trends Ecol Evol 1998; 13:329–  
818 332.
- 819 98. Yoshida T, Jones LE, Ellner SP, Fussmann GF, Hairston NG. **Rapid evolution drives**  
820 **ecological dynamics in a predator-prey system.** Nature 2003; 424:303–306.
- 821 99. Hairston NG, Ellner SP, Geber MA, Yoshida T, Fox JA. **Rapid evolution and the**  
822 **convergence of ecological and evolutionary time.** Ecol Lett 2005; 8:1114–1127.
- 823 100. Duffy MA, Sivars-Becker L. **Rapid evolution and ecological host–parasite dynamics.**  
824 Ecol Lett 2007; 10:44–53.
- 825 101. Fisk DL, Latta LC, Knapp RA, Pfrender ME. **Rapid evolution in response to introduced**  
826 **predators I: rates and patterns of morphological and life-history trait divergence.** BMC  
827 Evol Biol 2007; 7:22.
- 828 102. Scoville AG, Pfrender ME. **Phenotypic plasticity facilitates recurrent rapid adaptation**  
829 **to introduced predators.** Proc Natl Acad Sci 2010; 107:4260–4263.
- 830 103. Arendt J, Reznick D. **Convergence and parallelism reconsidered: what have we learned**  
831 **about the genetics of adaptation?** Trends Ecol Evol 2008; 23:26–32.
- 832 104. Rosenblum EB, Römler H, Schöneberg T, Hoekstra HE. **Molecular and functional basis**  
833 **of phenotypic convergence in white lizards at White Sands.** Proc Natl Acad Sci 2010;  
834 107:2113–2117.
- 835 105. Pantel JH, Leibold MA, Juenger TE. **Population differentiation in *Daphnia* alters**  
836 **community assembly in experimental ponds.** Am Nat 2011; 177:314–322.

- 837 106. Klüttgen B, Dülmer U, Engels M, Ratte H. **ADaM, an artificial freshwater for the**  
838 **culture of zooplankton.** Water Res 1994; 28:743–746.
- 839 107. Alekseev V, Lampert W. **Maternal control of resting-egg production in *Daphnia*.** Nature  
840 2001; 414:899–901.
- 841 108. Mitchell S, Read A. **Poor maternal environment enhances offspring disease resistance**  
842 **in an invertebrate.** Proc R Soc B-Biol Sci 2005; 272:2601–2607.
- 843 109. Bates D, Maechler M, Bolker B. **lme4: Linear mixed-effects models using S4 classes.** R  
844 Package Version 0999999-0 2012.
- 845 110. R Development Core Team. **R: A Language and Environment for Statistical**  
846 **Computing.** Vienna, Austria: R Foundation for Statistical Computing; 2009.
- 847 111. Meyer E, Aglyamova GV, Matz MV. **Profiling gene expression responses of coral larvae**  
848 **(*Acropora millepora*) to elevated temperature and settlement inducers using a novel**  
849 **RNA-Seq procedure.** Mol Ecol 2011; 20:3599–3616.
- 850 112. McKenna A, Hanna M, Banks E, Sivachenko A, Cibulskis K, Kernytsky A, Garimella K,  
851 Altshuler D, Gabriel S, Daly M, DePristo MA. **The Genome Analysis Toolkit: a MapReduce**  
852 **framework for analyzing next-generation DNA sequencing data.** Genome Res 2010;  
853 20:1297–1303.
- 854 113. DePristo MA, Banks E, Poplin R, Garimella KV, Maguire JR, Hartl C, Philippakis AA, del  
855 Angel G, Rivas MA, Hanna M, McKenna A, Fennell TJ, Kernytsky AM, Sivachenko AY,  
856 Cibulskis K, Gabriel SB, Altshuler D, Daly MJ. **A framework for variation discovery and**  
857 **genotyping using next-generation DNA sequencing data.** Nat Genet 2011; 43:491–498.
- 858 114. Knight JC. **Allele-specific gene expression uncovered.** Trends Genet 2004; 20:113–116.
- 859 115. Li JB, Levanon EY, Yoon J-K, Aach J, Xie B, LeProust E, Zhang K, Gao Y, Church GM.  
860 **Genome-wide identification of human RNA editing sites by parallel DNA capturing and**  
861 **sequencing.** Science 2009; 324:1210–1213.
- 862 116. Taub MA, Corrada Bravo H, Irizarry RA. **Overcoming bias and systematic errors in next**  
863 **generation sequencing data.** Genome Med 2010; 2:87.
- 864 117. McCullagh P, Nelder JA. **Generalized Linear Models.** Chapman & Hall, CRC; 1999.
- 865 118. Székely GJ, Rizzo ML. **Brownian distance covariance.** Ann Appl Stat 2009:1236–1265.
- 866 119. Székely GJ, Rizzo ML, Bakirov NK. **Measuring and testing dependence by correlation**  
867 **of distances.** Ann Stat 2007; 35:2769–2794.
- 868 120. Székely GJ, Rizzo ML. **The distance correlation -test of independence in high**  
869 **dimension.** J Multivar Anal 2013; 117:193–213.

- 870 121. Langfelder P, Horvath S. **WGCNA: an R package for weighted correlation network**  
871 **analysis**. BMC Bioinformatics 2008; 9:559.
- 872 122. Falcon S, Gentleman R. **How To Use GOstats Testing Gene Lists for GO Term**  
873 **Association**. 2011.
- 874 123. Supek F, Bošnjak M, Škunca N, Šmuc T. **REVIGO Summarizes and Visualizes Long**  
875 **Lists of Gene Ontology Terms**. PLoS ONE 2011; 6:e21800.
- 876 124. Hartmann H, Guthöhrlein EW, Siebert M, Luehr S, Söding J. **P-value-based regulatory**  
877 **motif discovery using positional weight matrices**. Genome Res 2013; 23:181–194.
- 878 125. Gupta S, Stamatoyannopoulos JA, Bailey TL, Noble WS. **Quantifying similarity between**  
879 **motifs**. Genome Biol 2007; 8:R24.
- 880
- 881

882 **TABLES**

883 **Table 1. Expected trait-pathway relationships for groups of *Daphnia* growth and fecundity**

884 **traits.** The categories and terms are derived from KEGG and Gene Ontology.

| <b>Category</b>                      | <b>Term</b>                                            | <b>Adult size</b> | <b>Offspring size</b> | <b>Offspring number</b> | <b>Interbrood</b> | <b>Growth rate</b> |
|--------------------------------------|--------------------------------------------------------|-------------------|-----------------------|-------------------------|-------------------|--------------------|
| Metabolism                           | Carbohydrate metabolism                                | X                 | X                     | X                       | X                 | X                  |
|                                      | Lipid metabolism                                       | X                 | X                     | X                       | X                 | X                  |
|                                      | Nucleotide/amino acid metabolism                       | X                 | X                     | X                       | X                 | X                  |
|                                      | Glycan biosynthesis                                    | X                 | X                     |                         | X                 | X                  |
|                                      | Secondary metabolite biosynthesis                      | X                 | X                     | X                       | X                 | X                  |
| Genetic Information Processing       | Transcription                                          | X                 | X                     | X                       | X                 | X                  |
|                                      | Translation: Ribosome                                  | X                 | X                     | X                       | X                 | X                  |
|                                      | Folding, sorting, degradation                          | X                 | X                     | X                       | X                 | X                  |
| Environmental Information Processing | Membrane transport                                     |                   | X                     | X                       |                   |                    |
|                                      | Signal transduction: mTOR                              | X                 | X                     | X                       | X                 | X                  |
|                                      | Signal transduction: MAPK                              | X                 | X                     |                         |                   | X                  |
|                                      | Signaling molecules: G protein-coupled receptors       |                   |                       |                         |                   |                    |
|                                      | Signaling molecules: Ion channels                      |                   |                       |                         |                   |                    |
| Cellular Processes                   | Signaling molecules: Cytokine receptors                | X                 |                       |                         |                   | X                  |
|                                      | Transport and catabolism                               | X                 |                       | X                       |                   | X                  |
|                                      | Cell growth and death: cell cycle                      | X                 | X                     | X                       | X                 | X                  |
|                                      | Cell growth and death: apoptosis                       | X                 |                       | X                       |                   | X                  |
| Organismal Systems                   | Immune system: Toll-like receptor signaling            | X                 |                       | X                       |                   | X                  |
|                                      | Endocrine system: Insulin signaling pathway            | X                 | X                     | X                       | X                 | X                  |
|                                      | Digestive system: carbohydrate, protein, fat digestion | X                 | X                     | X                       | X                 | X                  |
|                                      | Sensory system: phototransduction                      |                   |                       |                         |                   |                    |
|                                      | Sensory system: taste transduction                     | X                 | X                     | X                       |                   | X                  |

885

886

887

888

889 **Table 2. Quantitative genetics of growth and fecundity traits in the *Daphnia* panel.**  $H^2 =$

890 broad-sense heritability;  $CV_g =$  genotypic coefficient of variation;  $V_{g,p} =$  genotypic and

891 phenotypic variances; mean = mean trait value across all replicates of all clones.

| Stage     | Trait                             | mean   | $V_g$    | s.d.( $V_g$ ) | $V_R$    | s.d.( $V_R$ ) | $V_p$    | $H^2$ | LCL( $H^2$ ) | UCL( $H^2$ ) | $I_g$ |
|-----------|-----------------------------------|--------|----------|---------------|----------|---------------|----------|-------|--------------|--------------|-------|
| Offspring | # (brood 1)                       | 8.089  | 4.60E+00 | 2.15E+00      | 2.14E+01 | 4.62E+00      | 2.60E+01 | 0.18  | 0.15         | 0.20         | 7.04  |
|           | mass (br. 1, mg)                  | 0.003  | 1.03E-06 | 1.01E-03      | 4.97E-06 | 2.23E-03      | 6.00E-06 | 0.17  | 0.14         | 0.20         | 9.18  |
|           | # (br. 2)                         | 11.156 | 1.51E-08 | 1.23E-04      | 6.61E+01 | 8.13E+00      | 6.61E+01 | 0.00  | -0.03        | 0.03         | 0.00  |
|           | # (br. 3)                         | 12.653 | 1.31E+01 | 3.62E+00      | 4.48E+01 | 6.69E+00      | 5.79E+01 | 0.23  | 0.20         | 0.25         | 8.20  |
|           | mass (br. 3)                      | 0.003  | 0.00E+00 | 0.00E+00      | 3.67E-06 | 1.92E-03      | 3.67E-06 | 0.00  | -0.03        | 0.03         | 0.00  |
| Adult     | mass (mg)                         | 0.068  | 2.67E-14 | 1.64E-07      | 9.04E-04 | 3.01E-02      | 9.04E-04 | 0.00  | -0.03        | 0.03         | 0.00  |
|           | length (mm)                       | 2.322  | 3.59E-02 | 1.89E-01      | 1.00E-01 | 3.17E-01      | 1.36E-01 | 0.26  | 0.25         | 0.28         | 0.67  |
|           | depth (mm)                        | 1.459  | 1.20E-02 | 1.10E-01      | 4.63E-02 | 2.15E-01      | 5.83E-02 | 0.21  | 0.19         | 0.23         | 0.56  |
|           | tailspine (mm)                    | 0.631  | 9.51E-03 | 9.75E-02      | 1.19E-02 | 1.09E-01      | 2.14E-02 | 0.44  | 0.43         | 0.46         | 2.39  |
|           | time to br. 1 (days)              | 12.146 | 2.50E+00 | 1.58E+00      | 1.07E+01 | 3.27E+00      | 1.32E+01 | 0.19  | 0.16         | 0.22         | 1.70  |
|           | time br. 1 to br. 2 (d)           | 3.255  | 4.59E-10 | 2.14E-05      | 3.12E+00 | 1.77E+00      | 3.12E+00 | 0.00  | -0.04        | 0.04         | 0.00  |
|           | time br. 2 to br. 3 (d)           | 3.604  | 2.78E-10 | 1.67E-05      | 4.18E+00 | 2.05E+00      | 4.18E+00 | 0.00  | -0.03        | 0.03         | 0.00  |
|           | growth rate (mg d <sup>-1</sup> ) | 0.004  | 1.49E-16 | 1.22E-08      | 2.33E-06 | 1.53E-03      | 2.33E-06 | 0.00  | -0.02        | 0.02         | 0.00  |

892  
893

894 **Table 3. Summary statistics for differentially expressed genes (DEGs) and coexpression**  
 895 **modules associated with variation in the fourteen *Daphnia* growth and fecundity traits.**

896 The specific genes and module memberships for each trait are provided in SI Table 5.

| Trait                     | Gene summaries |             |               |             | Modularity summary |                  |                  |
|---------------------------|----------------|-------------|---------------|-------------|--------------------|------------------|------------------|
|                           | # genes        | # annotated | # unannotated | % annotated | # modules          | Min. module size | Max. module size |
| Growth rate               | 75             | 28          | 47            | 37.33       | 4                  | 8                | 35               |
| # off. brood 1            | 132            | 58          | 74            | 43.94       | 4                  | 18               | 67               |
| # off. brood 2            | 196            | 72          | 124           | 36.73       | 3                  | 26               | 137              |
| # off. brood 3            | 160            | 62          | 98            | 38.75       | 5                  | 15               | 54               |
| Time to brood 1           | 135            | 48          | 87            | 35.56       | 6                  | 12               | 36               |
| brood 1: brood 2 time     | 99             | 53          | 46            | 53.54       | 5                  | 10               | 40               |
| brood 2: brood 3 time     | 98             | 43          | 55            | 43.88       | 5                  | 12               | 30               |
| brood 1 offspring mass    | 140            | 54          | 86            | 38.57       | 3                  | 13               | 110              |
| brood 3 offspring mass    | 261            | 111         | 150           | 42.53       | 3                  | 14               | 185              |
| maternal body depth       | 152            | 60          | 92            | 39.47       | 4                  | 21               | 57               |
| maternal body length      | 182            | 63          | 119           | 34.62       | 5                  | 8                | 85               |
| maternal mass             | 204            | 92          | 112           | 45.10       | 5                  | 8                | 120              |
| maternal tailspine length | 198            | 86          | 112           | 43.43       | 5                  | 9                | 72               |

897

898

899

900

901 **FIGURE LEGENDS**

902

903 **Figure 1. Panel variation of *Daphnia* size traits.** First and third brood individual mass is the  
904 mass of individual offspring, maternal size characteristics are measured at the third brood, and  
905 growth rate is calculated from the maternal mass, first brood individual mass, and time from  
906 birth to third brood (see Figure 2). Error bars are 95% confidence intervals, and the clone-wise  
907 summary data is provided in SI Table 1.

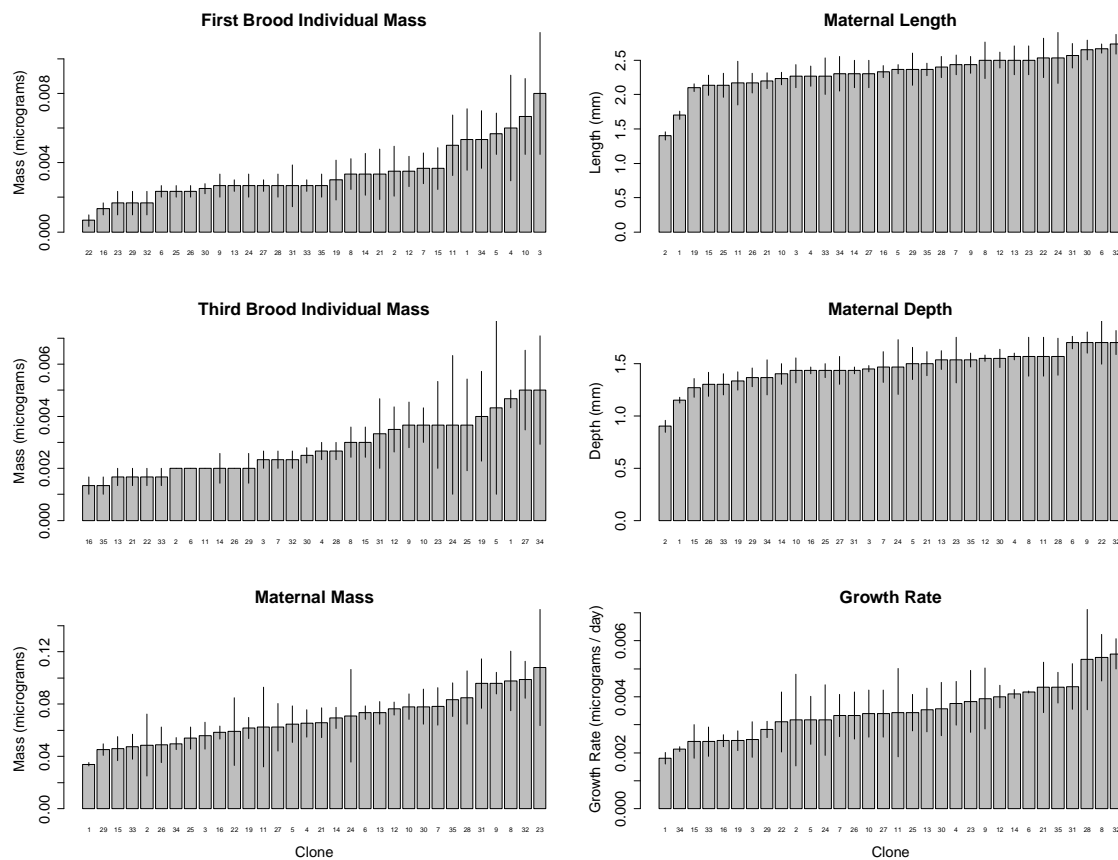

908

909



910

911 **Figure 2. Panel variation in the number and timing of offspring.** Error bars are 95%

912 confidence intervals, and the clone-wise summary data is provided in SI Table 1.

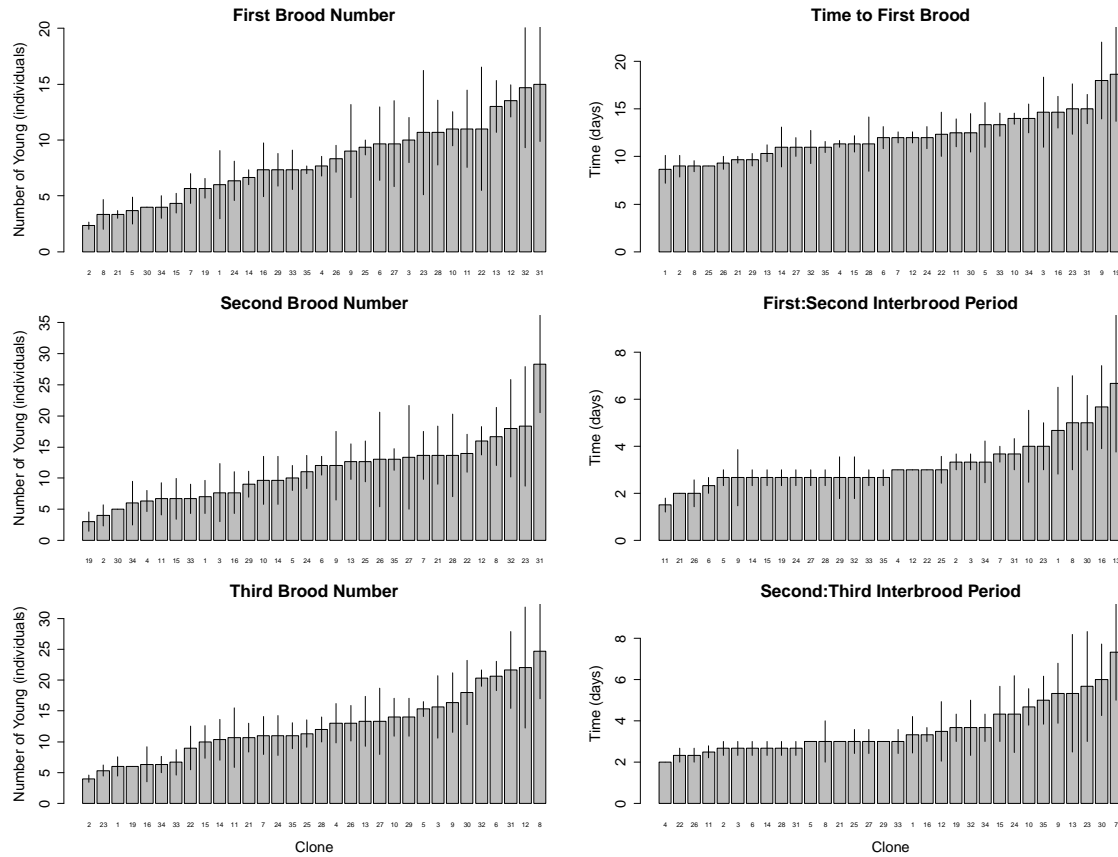

913

914

915 **Figure 3. Genetic (below diagonal) and phenotypic (above diagonal) inter-trait correlations**  
916 **among growth and fecundity traits.** “bN” is the brood number of interest. Note that  
917 phenotypic correlations tend to be weaker than genetic correlations, but there are exceptions such  
918 as the stronger phenotypic correlation between b3 mass and several other traits.

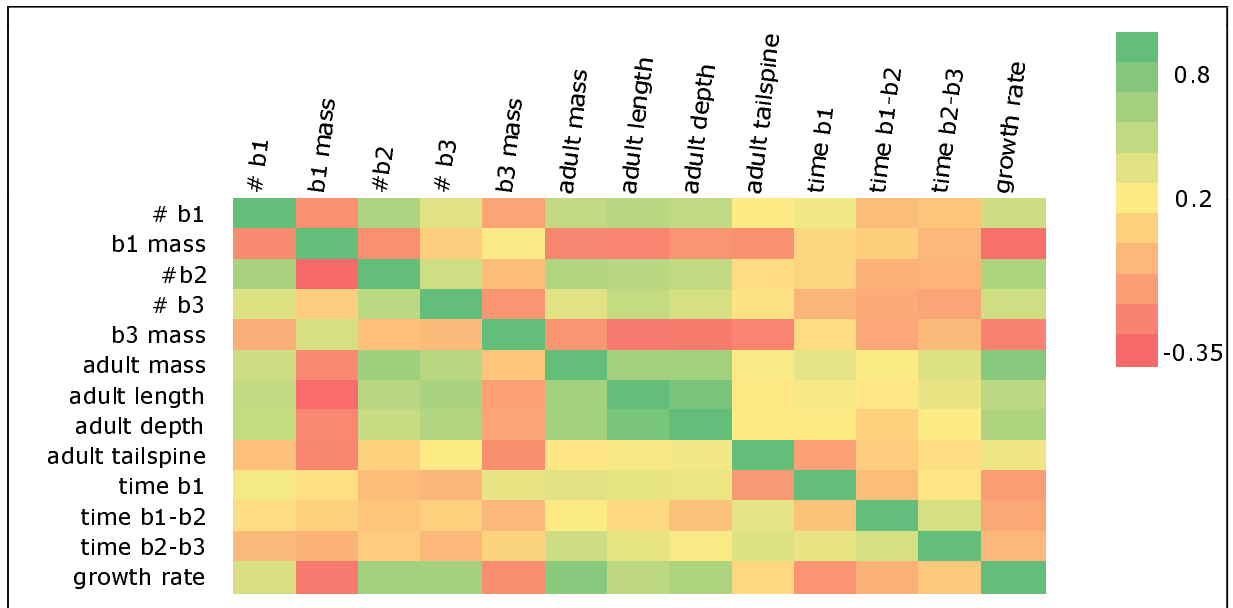

919

920 **Figure 4. Nucleotide diversity (Nei's  $d$ ) across the genome (A), among scaffolds anchored**  
921 **to linkage groups (B), and within linkage group 3 (C).** Light gray vertical lines demarcate  
922 linkage group boundaries, and the vertical red lines in panel C mark the window containing LDH  
923 genes, which is a common marker for clone identification in ecological studies. Horizontal  
924 dashed lines are the mean diversity values and horizontal dotted lines mark the 95th percentile of  
925 estimated diversity values. Nucleotide diversity was calculated either in 50-kb non-overlapping  
926 windows or over the entirety of a scaffold (if less than 50kb), and only if there were  $\geq 3$   
927 polymorphic, typed loci in the window/scaffold. Ordering follows the marker order given on the  
928 *Daphnia* Genomics Consortium web portal; scaffolds with markers whose order was ambiguous  
929 or conflicting relative to the genome assembly were considered unanchored and move to the  
930 unanchored section of panel A.

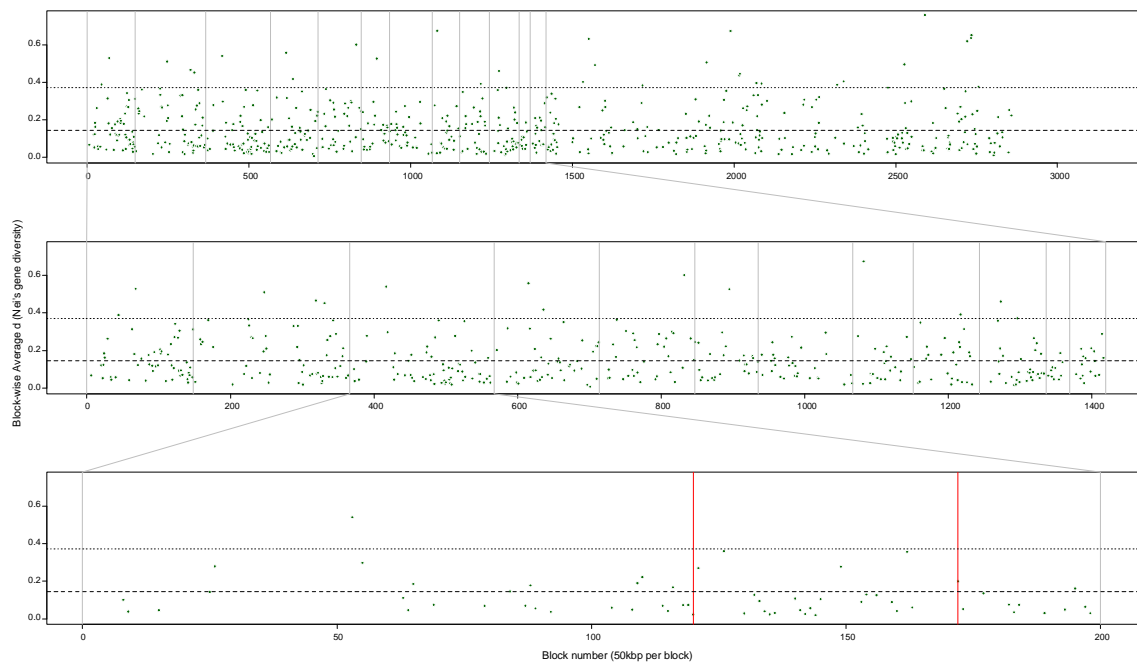

931

932

933

934 **Figure 5. Coexpression networks associated with variation in adult mass (A) and third-**  
935 **brood offspring mass (B).** Node size is proportional to the betweenness-centrality of the gene;  
936 larger nodes connect more groups of coexpressed genes. Select genes with high betweenness-  
937 centrality are labeled and discussed in the text.

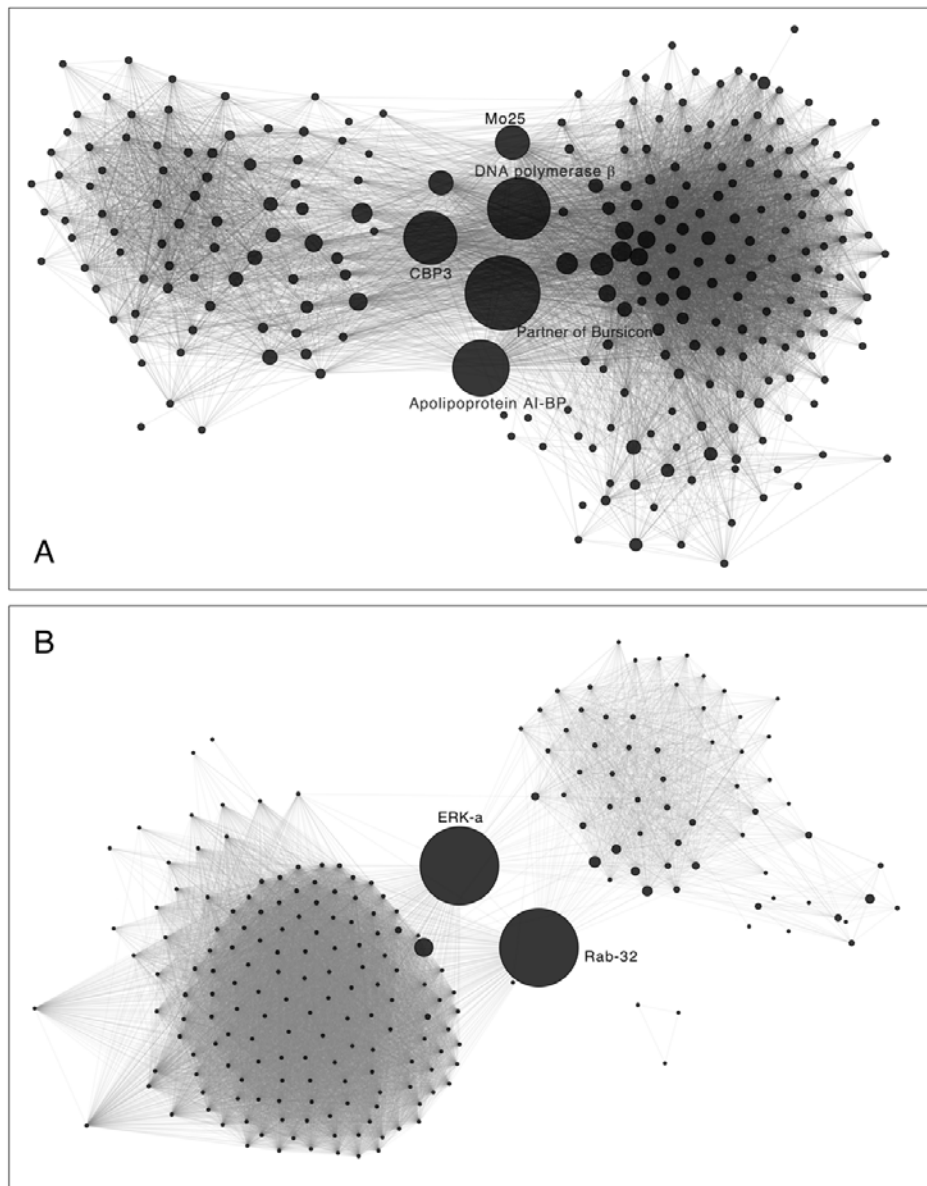

938

939

940 **Figure 6. Gene Ontology Biological Process term enrichment for all growth and fecundity**  
 941 **traits (A), adult *Daphnia* traits (B), and offspring traits (C).** Figures are based on the  
 942 reduction and summary provided by REVIGO (Supek et al. 2011), given the enrichment  
 943 calculations from GOSTats (Gentleman 2011). Large font labels are representative terms for the  
 944 colored block over which the label is situated, and block size is proportional to the p-value of the  
 945 enrichment (i.e., larger blocks possess lower p).

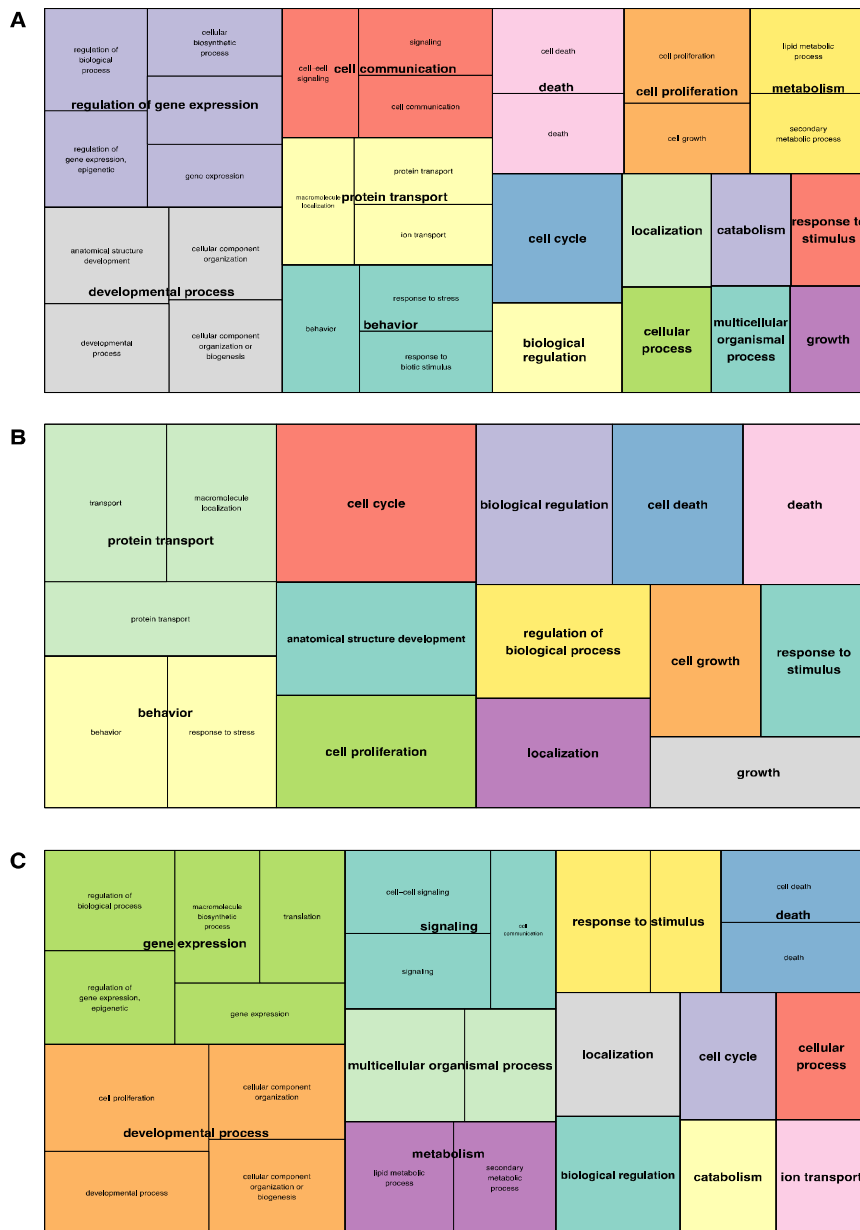

946

947

948 **Figure 7. An integrated gene network hypothesis for three *Daphnia* life history traits.**

949 SNPs and the transcriptional regulators in which they are found are represented by squares;

950 differentially expressed genes (DEGs) whose expression is related to marker variation and trait

951 variation are represented by gray circles; and traits are represented by blue diamonds. Edges

952 connecting marker-genes, DEGs, and time to first brood are highlighted darker blue. Labels and

953 edges between coexpressed DEGs are suppressed for figure clarity; the data are available in SI

954 Table X. Highlighted nodes and edges are discussed in the text.

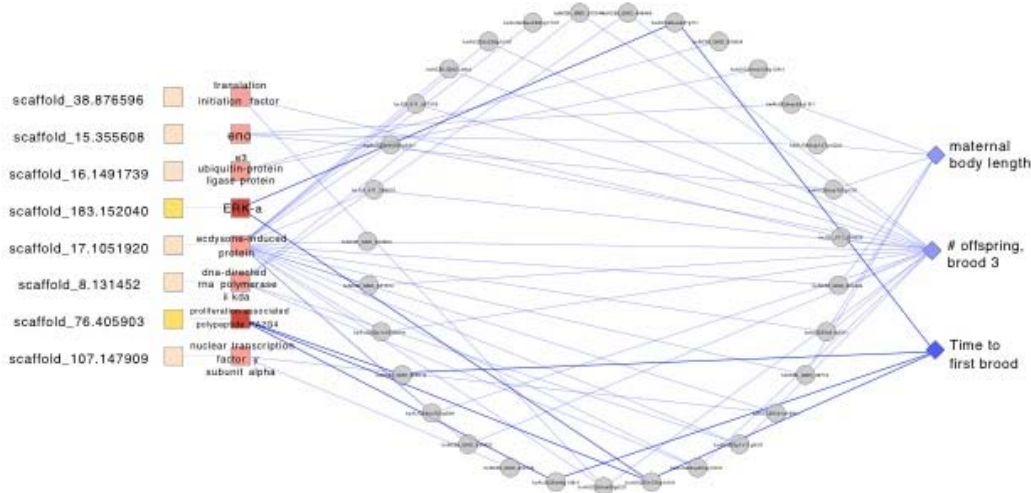

955

956
